# Supplementary material for: Prediction of type 2 diabetes mellitus onset using logistic regression-based scorecards
Source: eLife. 2022 Jun 22;11:e71862. doi: 10.7554/eLife.71862 (PMC9255967; doi:10.7554/eLife.71862)
Supplement: Figure 3—source data 1. [file elife-71862-fig3-data1.csv]

File name	quant_lower	quant_mean	quant_upper	quant_CI
LR_No_reticulocytes_scoreboard	11.883279228066925	47.7140491875278	108.88125698324023	47.71 (11.88-108.88)
SA_Four_BT_no_retic	13.655032784598214	42.882810726547	109.12165518380885	42.88 (13.66-109.12)
LR_Blood_Tests	17.74014857051411	75.3763912906381	133.45054861177368	75.38 (17.74-133.45)
LR_Finrisc	2.285638476862197	4.130011714103544	7.36827059180125	4.13 (2.29-7.37)
SA_Antro_neto_whr	4.992917172698568	10.650891156923732	23.667327008928574	10.65 (4.99-23.67)
SA_Five_BT	11.882291666666672	35.183134181672315	115.13800304360419	35.18 (11.88-115.14)
All_Diabetes	15.089518459069025	72.59342864737324	134.85590314202298	72.59 (15.09-134.86)
LR_Five_blood_tests_scoreboard	12.03854823423783	48.26601462893139	108.24134753102621	48.27 (12.04-108.24)
SA_GDRS_revision	1.4615384615384617	2.534190780346783	4.446210428305399	2.53 (1.46-4.45)
LR_Anthro_scoreboard	4.999720982142858	17.146508576365957	65.96895912801979	17.15 (5.00-65.97)
LR_Five_Blood_Tests	10.496880719951193	32.58769942223577	110.88231026785715	32.59 (10.50-110.88)
LR_No_reticulocytes	10.789518932340162	32.50325197699076	110.00614525139665	32.50 (10.79-110.01)
LR_Antro_neto_whr	4.83976165695333	16.89558687852002	65.92818080357144	16.90 (4.84-65.93)
