# Supplementary material for: Prediction of type 2 diabetes mellitus onset using logistic regression-based scorecards
Source: eLife. 2022 Jun 22;11:e71862. doi: 10.7554/eLife.71862 (PMC9255967; doi:10.7554/eLife.71862)
Supplement: Figure 3—source data 2. [file elife-71862-fig3-data2.csv]

Covariates names	CI 0.025	Mean	CI 0.975	Median	Summary
Age at last visit	0.06491857606237024	0.15885435254465588	0.2507265275325524	0.15853096041279013	0.16 (0.06:0.25)
Bias	-0.8544829546532241	-0.7388513843550574	-0.6360805680057785	-0.7370945603709622	-0.74 (-0.85:-0.64)
Body mass index (BMI)	0.46802120222805665	0.6754213292032831	0.882412796224666	0.6750907441245994	0.68 (0.47:0.88)
Hip circumference	-0.21666235966701292	-0.045088684202136534	0.13134436836525928	-0.0481242702296184	-0.05 (-0.22:0.13)
Sex	-0.3011291095378447	-0.14203951691000608	0.0371844946787781	-0.14155050781427836	-0.14 (-0.30:0.04)
Standing height	-0.29895642319645915	-0.15179922011208744	-0.0019313081381493848	-0.1537620088139267	-0.15 (-0.30:-0.00)
Waist circumference	0.07080139489682649	0.3067590151465604	0.5594041687840664	0.3023531798777821	0.31 (0.07:0.56)
Waist-hips ratio	0.3442960530378984	0.5423894870876086	0.723903334728752	0.5446406948307105	0.54 (0.34:0.72)
Weight	-0.1318391847223721	0.03212659258444063	0.18674595083635817	0.034441431708926495	0.03 (-0.13:0.19)
Years between visits	0.2851827107720361	0.3774391177803774	0.467946698810679	0.3789123254247751	0.38 (0.29:0.47)
